# Supplementary material for: Apical Medium Flow Influences the Morphology and Physiology of Human Proximal Tubular Cells in a Microphysiological System
Source: Bioengineering (Basel). 2022 Sep 30;9(10):516. doi: 10.3390/bioengineering9100516 (PMC9598399; doi:10.3390/bioengineering9100516)
Supplement: Supplementary file 1 [file bioengineering-09-00516-s001.zip › bioengineering-1893311-supplementary.pdf]

## Supplementary Information

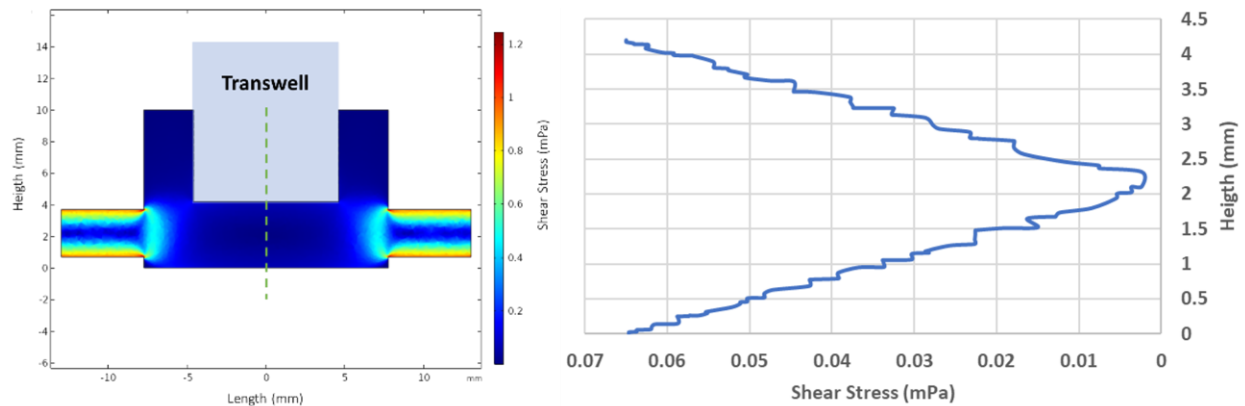

**Figure S1. Simulation of the shear stress on RPTECs cultured in the Vitrofluid system:** (left) shear stress heat map generated by a flow rate of 150  $\mu\text{L}/\text{min}$  in the cross section of the Vitrofluid with a transwell placed 4.2 mm above the well floor. The color scale on the right is in mPa (range between 0 and 1.2 mPa). The dashed line indicates the central axis of the Vitrofluid well, where shear stress was calculated. (right) Shear stress calculated along the central axis with  $4.2 \times 10^{-4}$  dyne/cm<sup>2</sup> in average (range  $4.6 \times 10^{-5}$  and  $6.5 \times 10^{-4}$  dyne/cm<sup>2</sup>).

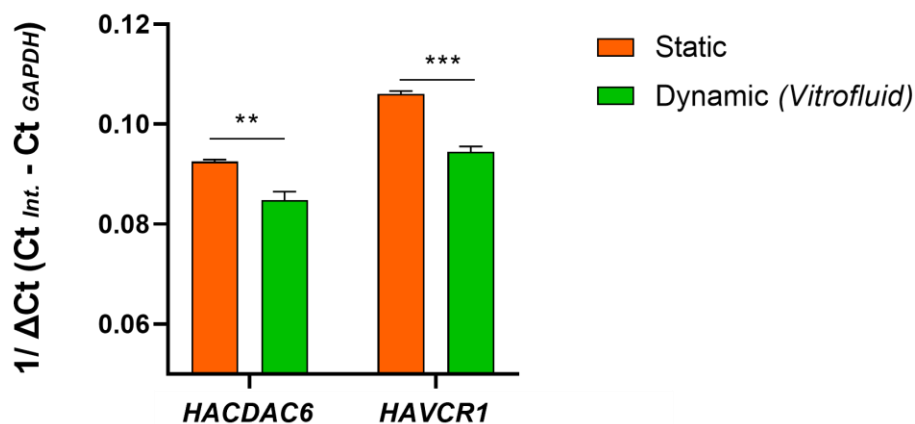

**Figure S2. Gene expression of HDAC6 and HAVCR1 in RPTECs under static and dynamic conditions:** HAVCR1 and HDAC6 expression were evaluated on day 7. Data are shown as  $1/\Delta\text{Ct}$ . GAPDH was used as a housekeeping gene (mean  $\pm$  SD;  $n = 2$  biological repeats in technical triplicates).

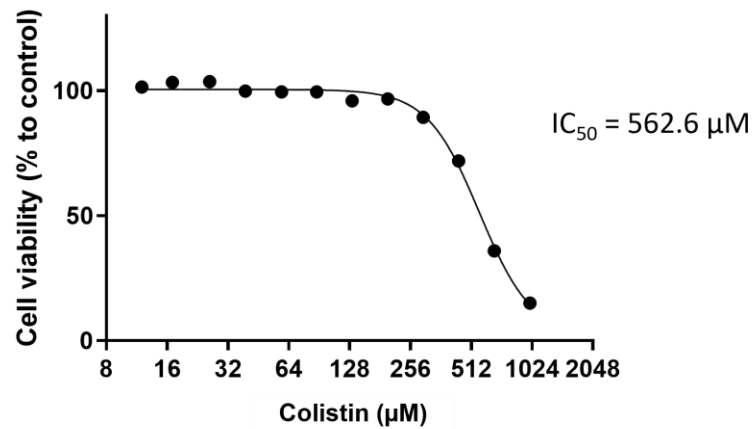

**Figure S3. Response of RPTEC cultures to different concentrations of colistin under static conditions:**  $\text{IC}_{50}$  value and dose-response curve of colistin measured by ATP assay in static RPTEC cultures exposed for 2 days. Data are shown as a percentage of control (untreated cells) and represented as mean  $\pm$  SD ( $n = 2$  biological repeats in triplicate technical repeats).

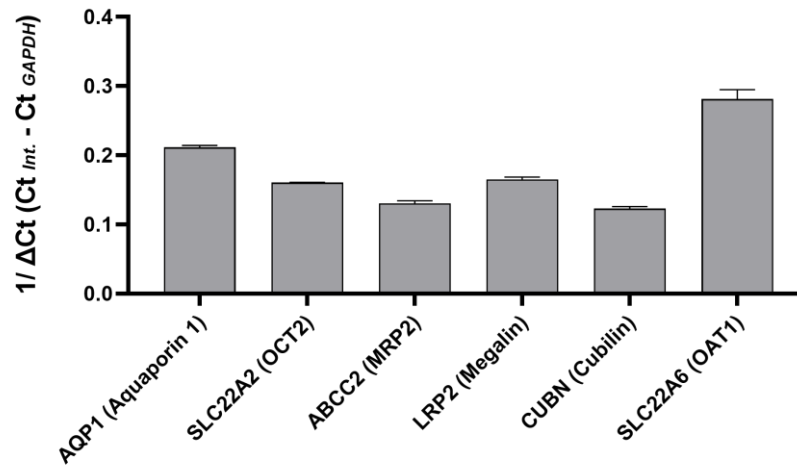

**Figure S4. Gene expression of renal transporters from RNA samples extracted from human kidney:** Total human kidney RNA (QS0616, Thermo Fisher Scientific) was used as a reference for expression levels of selected transporters. Data are shown as  $1/\Delta\text{Ct}$ . *GAPDH* was used as a reference gene (data are represented as the mean  $\pm$  SD of 3 technical triplicates).
